# Supplementary material for: MicroRNA profiling of peripheral nerve sheath tumours identifies miR-29c as a tumour suppressor gene involved in tumour progression
Source: PubMed Central journal article supplement — Br J Cancer. 2012 Nov 22;108(4):964–72. doi: 10.1038/bjc.2012.518 (PMC3590650; doi:10.1038/bjc.2012.518), 2012-11-22

# Supplementary Figure 1

A

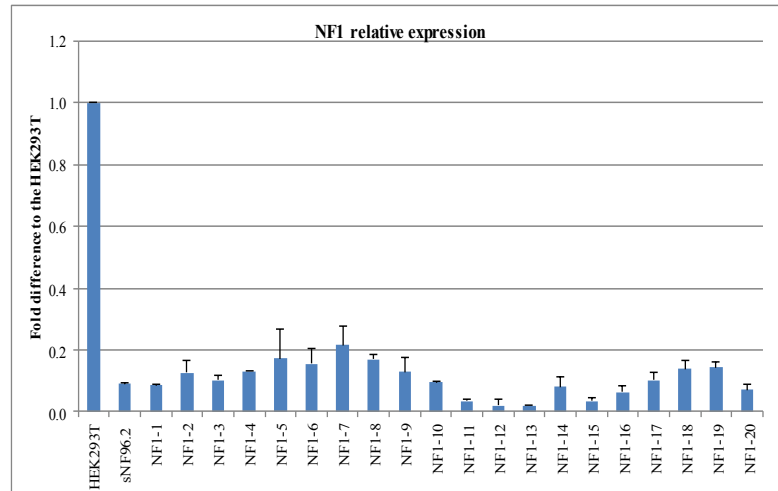

B

sNF96.2 mutated in NF1 exon 21

G C G A T G G C T C T G G C A A T G T G G T T C

165 170 175 180 185

3683delC

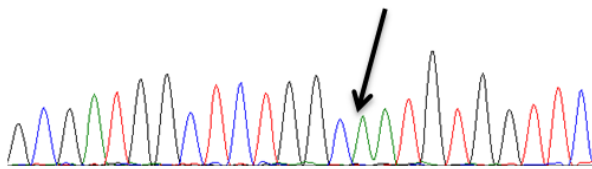

HT1080 Wildtype for NF1

C G A T G G C T C T G G C A A T G T G G T T C

5 170 175 180 185

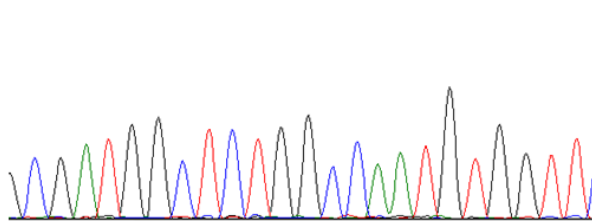

Supplement: bjc2012518x1.pdf [file bjc2012518x1.pdf]
