# Supplementary figures and images for: MicroRNA profiling of peripheral nerve sheath tumours identifies miR-29c as a tumour suppressor gene involved in tumour progression
Source: PubMed Central journal article supplement — Br J Cancer. 2012 Nov 22;108(4):964–72. doi: 10.1038/bjc.2012.518 (PMC3590650; doi:10.1038/bjc.2012.518), 2012-11-22

# Supplementary figure 2

## A

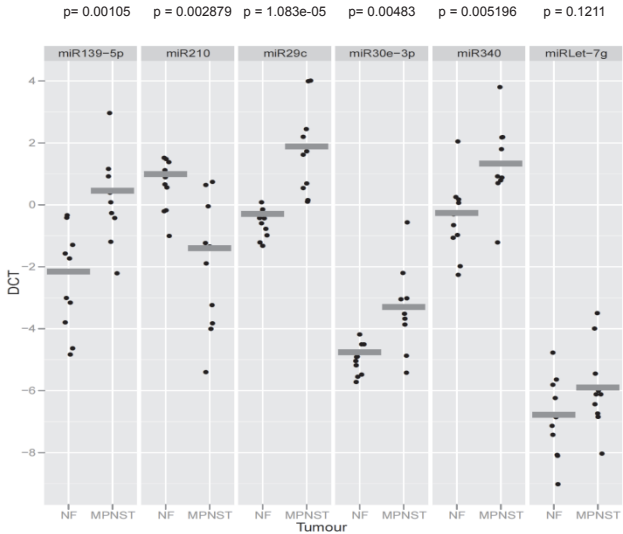

## B

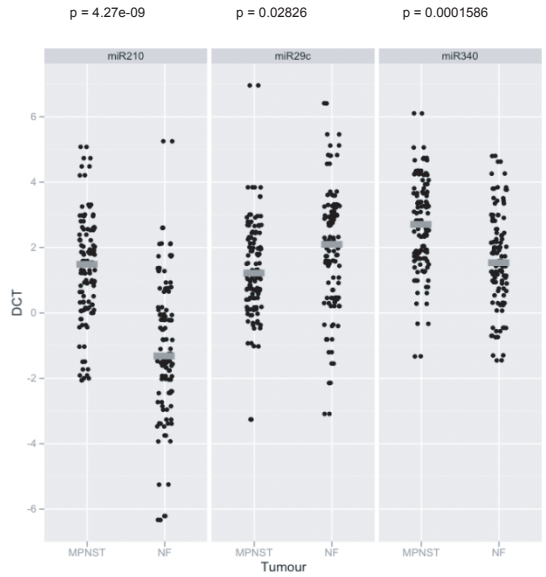

Supplement: bjc2012518x2.pdf [file bjc2012518x2.pdf]

# Supplementary Figure 3

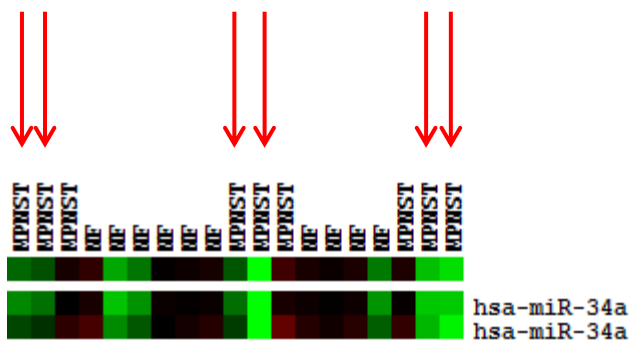

Supplement: bjc2012518x3.pdf [file bjc2012518x3.pdf]

# Supplementary 4

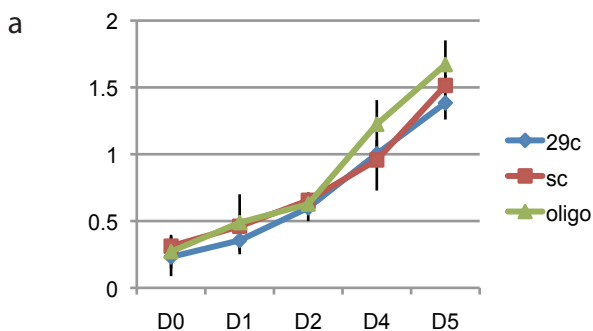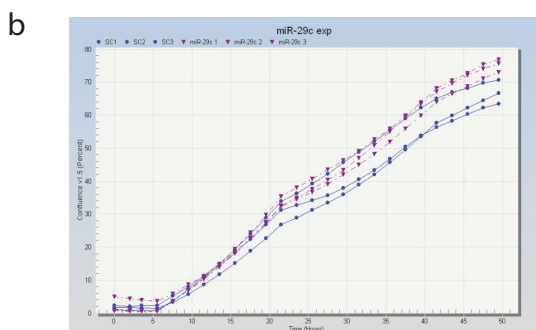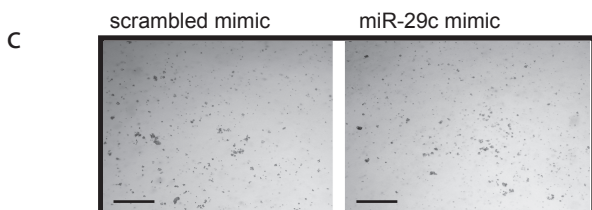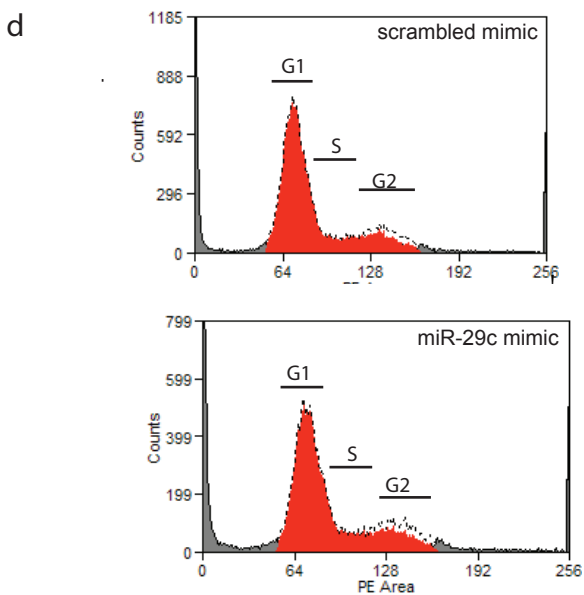

Supplement: bjc2012518x4.pdf [file bjc2012518x4.pdf]
